# Supplementary material
Source: PubMed Central journal article supplement (PMC2741703)
Supplement: 09_30_Dapas_Suppl.pdf [file 09_30_Dapas_Suppl.pdf]

## Supplementary material – 1

A)

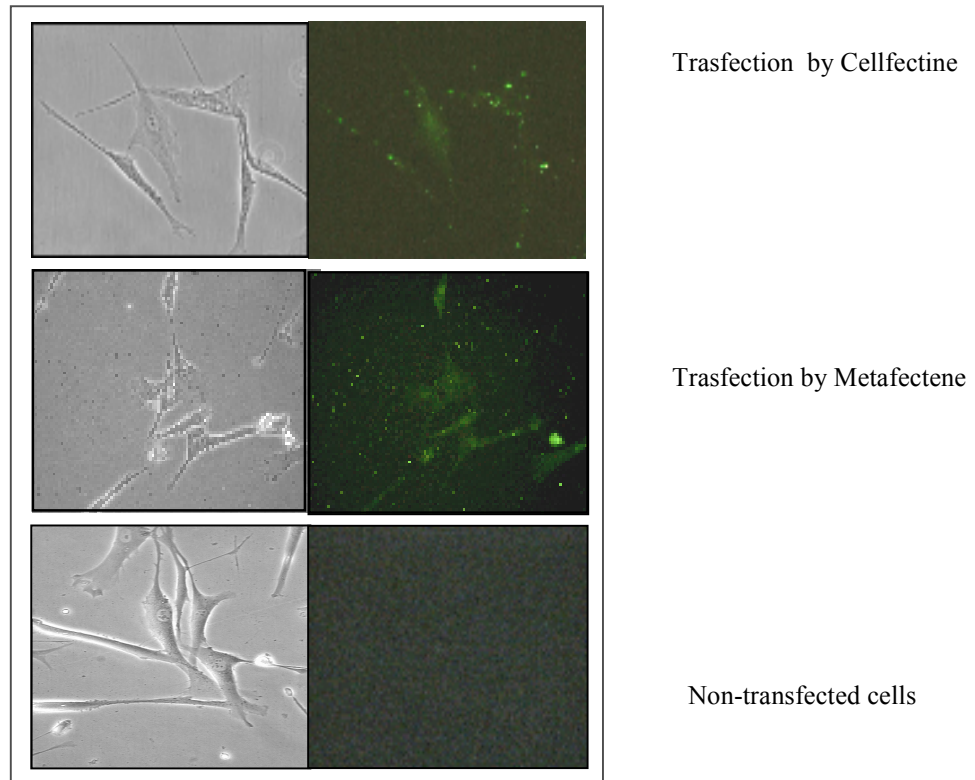

B)

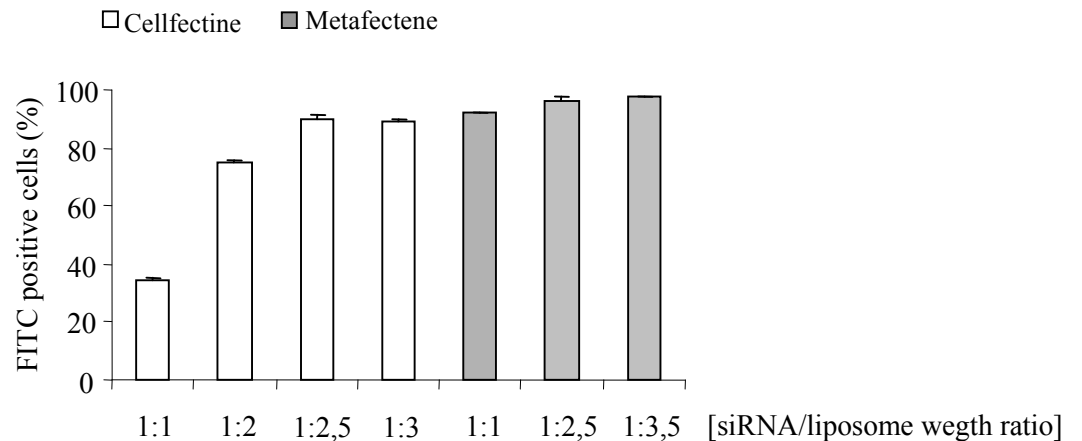

**Efficiency of transfection and intracellular localization of the FITC-labelled siRNA GL2 in human CSMCs.** Just after the end of transfection, the intracellular localization (A) of the FITC-labelled siRNA GL2 transfected by either Cellfectin or Metafectene was documented in living cells to avoid artifacts introduced by fixation; under optimized conditions (2 hours of transfection, siRNA/transfectant weight ratio of 1:2,5 and 1:1 for Cellfectin and Metafectene, respectively) a similar intracellular localization characterized by an even fluorescence in the cytoplasm and a positive fluorescence in the nucleus was observed; B) the amount of FITC positive cells was then evaluated by flow cytometry at different weight ratios siRNA- transfectant using an siRNA concentration of 230 nM and a transfection time of two hours; both transfectants displayed similar transfection efficacies. Data are expressed as mean  $\pm$  SEM, n = 4

## Supplementary material -2

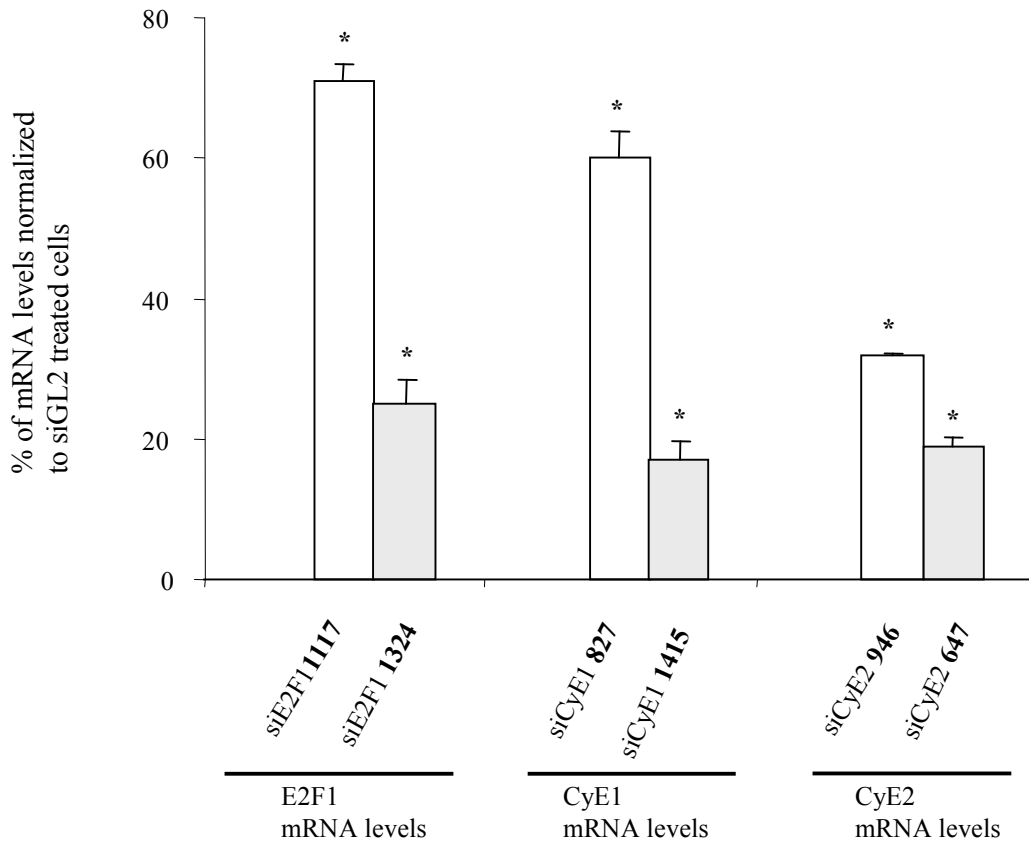

### **Comparison between the effects on target mRNAs by the different pairs of siRNAs.**

Target mRNA levels were evaluated three days after siRNA delivery by Cellfectin (CSMCs from donor 1); 28S transcript levels served as normalizer; data are expressed as mean  $\pm$  SEM, n = 4. \* p < 0.05 compared to control.

## Supplementary material – 3

A)

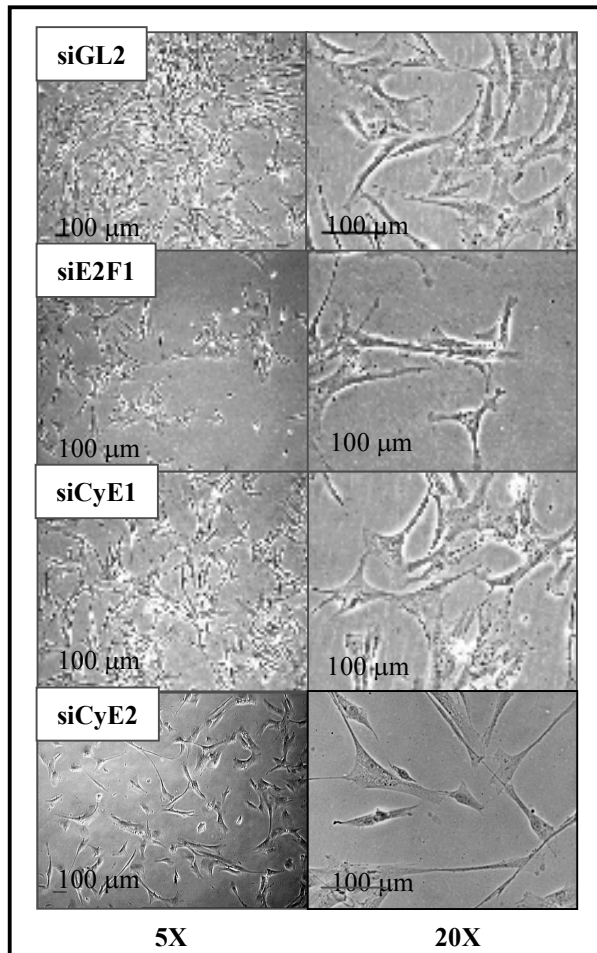

B)

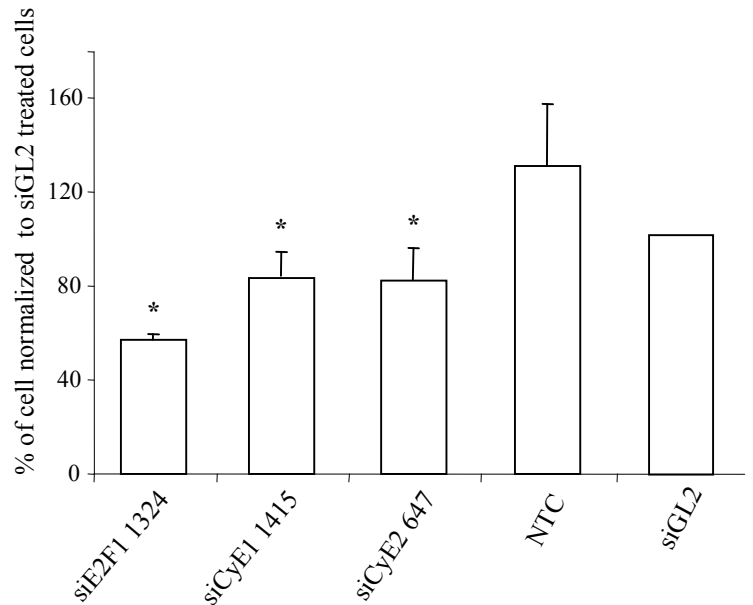

### siRNA effects on CSMC amount

Three days after transfection, each specific siRNA (230 nM) delivered by Cellfectin was able to reduce the amount of CSMCs from donor 1 (A): cells were analysed by phase contrast microscopy, representative fields are shown; cumulative data from both donors are also reported (B), NTC = non treated cells, siGL2 = control siRNA treated cells; data are expressed as mean  $\pm$  SEM, n = 4. \* p < 0.05 compared to control

## Supplementary material – 4

A)

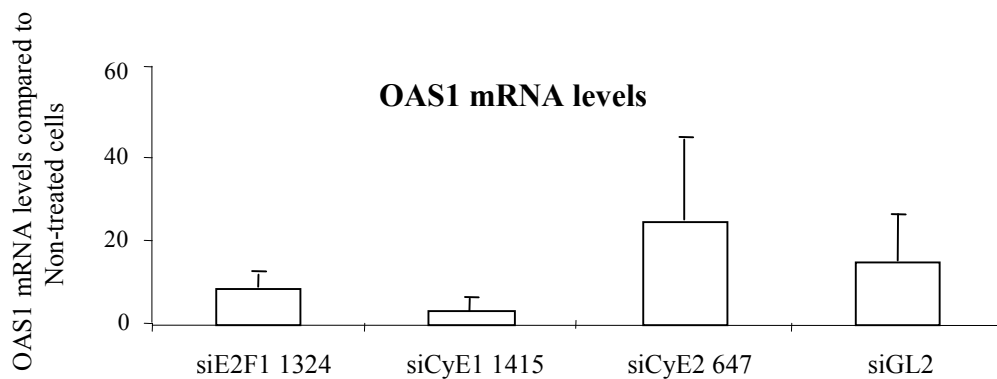

B)

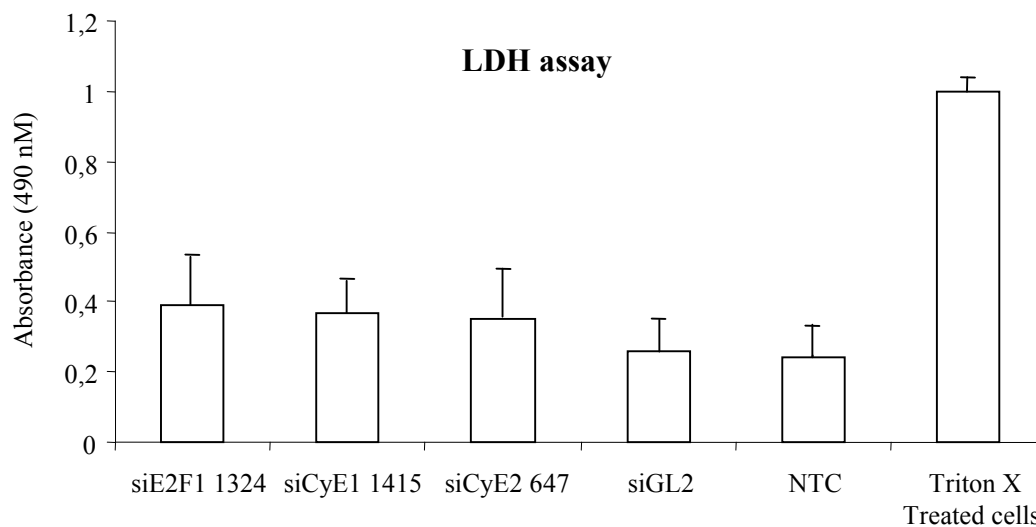

C)

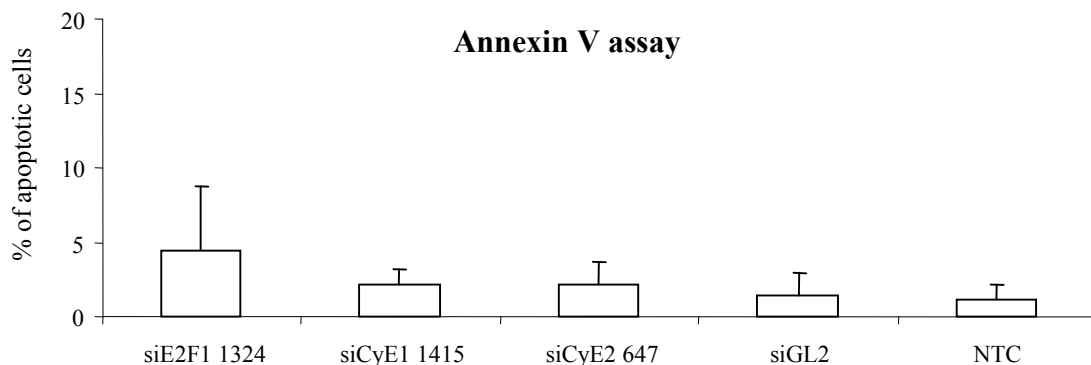

### siRNA effects on OAS1 mRNA levels and cell death

A) Three days after transfection, none of the tested siRNAs (230nM) induced a relevant expression of interferon response-associated gene 2'-5'-oligoadenylate synthetase 1 (OAS1) in CSMCs (cumulative data from both donors, 28S transcript levels served as normalizer), NTC = non treated cells, siGL2 = control siRNA treated cells; data are expressed as mean  $\pm$  SEM, n = 6; the selected siRNAs neither induced any significant cytotoxicity as evaluated by lactate dehydrogenase (LDH; treatment by triton X-100, 1% final concentration, was introduced as positive control) test (B) nor apoptosis as evaluated by annexin V test ( $p > 0.1$ ) (C); NTC = non treated cells; cumulative data from both donors are expressed as mean  $\pm$  SEM, n = 6
